# Supplementary material for: Identification and Validation of Human Papillomavirus Encoded microRNAs
Source: PLoS One. 2013 Jul 30;8(7):e70202. doi: 10.1371/journal.pone.0070202 (PMC3728184; doi:10.1371/journal.pone.0070202)
Supplement: Table S2 — 393 Complete papillomavirus genomes in reference genome. Each raw present one complete papillomavirus genome with its NCBI Reference Sequence, start and end position in the reference genome and its full name. (XLSX) [file pone.0070202.s008.xlsx]

## Sheet: Table S2
Table S2. 393 Complete papillomavirus genomes in reference genome
NC_004197.1	1	7276	1. Bovine papillomavirus 3 complete genome 7 276 bp circular DNA NC_004197.1 GI:23216976
NC_001678.1	7277	15304	2. Rhesus monkey papillomavirus complete genome 8 028 bp circular DNA NC_001678.1 GI:9628445
NC_001596.1	15305	22738	3. Human papillomavirus type 9 complete genome 7 434 bp circular DNA NC_001596.1 GI:9627396
NC_001591.1	22739	30298	4. Human papillomavirus type 49 complete genome 7 560 bp circular DNA NC_001591.1 GI:9627363
NC_001531.1	30299	38044	5. Human papillomavirus - 5 complete genome 7 746 bp circular DNA NC_001531.1 GI:9627145
NC_014835.1	38045	45208	6. Human papillomavirus type 148 complete genome 7 164 bp circular DNA NC_014835.1 GI:317046144
NC_001694.1	45209	53197	7. Human papillomavirus - 61 complete genome 7 989 bp circular DNA NC_001694.1 GI:9628574
GU129016.1	53198	60361	8. Human papillomavirus type 148 complete genome 7 164 bp circular DNA GU129016.1 GI:309273978
NC_011051.1	60362	68393	9. Capreolus capreolus papillomavirus 1 complete genome 8 032 bp linear DNA NC_011051.1 GI:194268064
GU233853.1	68394	75612	10. Human papillomavirus type 129 complete genome 7 219 bp circular DNA GU233853.1 GI:313755950
GU225708.1	75613	82871	11. Human papillomavirus type 128 complete genome 7 259 bp circular DNA GU225708.1 GI:313755942
GU117634.1	82872	90180	12. Human papillomavirus type 134 complete genome 7 309 bp circular DNA GU117634.1 GI:312451821
GU117633.1	90181	97538	13. Human papillomavirus type 133 complete genome 7 358 bp circular DNA GU117633.1 GI:312451813
GU117632.1	97539	104663	14. Human papillomavirus type 132 complete genome 7 125 bp circular DNA GU117632.1 GI:312451805
GU117631.1	104664	111845	15. Human papillomavirus type 131 complete genome 7 182 bp circular DNA GU117631.1 GI:312451797
GU117630.1	111846	119233	16. Human papillomavirus type 130 complete genome 7 388 bp circular DNA GU117630.1 GI:312451789
GU117629.1	119234	126566	17. Human papillomavirus type 149 complete genome 7 333 bp circular DNA GU117629.1 GI:312451781
GU117628.1	126567	134438	18. Human papillomavirus type 94 complete genome 7 872 bp circular DNA GU117628.1 GI:312451772
FR751039.1	134439	142274	19. Human papillomavirus type 68b complete genome 7 836 bp circular DNA FR751039.1 GI:315629559
AY057109.1	142275	150003	20. Fringilla coelebs papillomavirus complete genome 7 729 bp circular DNA AY057109.1 GI:21724205
NC_013035.1	150004	157187	21. Human papillomavirus 116 complete genome 7 184 bp circular DNA NC_013035.1 GI:254810663
EU541442.1	157188	164414	22. Human papillomavirus type 112 complete genome 7 227 bp circular DNA EU541442.1 GI:189003650
EU541441.1	164415	171760	23. Human papillomavirus type 109 complete genome 7 346 bp circular DNA EU541441.1 GI:189003642
EF680235.1	171761	179792	24. Western roedeer papillomavirus 1 isolate CcPV-1 complete genome 8 032 bp linear DNA EF680235.1 GI:157273820
DQ080081.1	179793	187051	25. Human papillomavirus type 101 complete genome 7 259 bp circular DNA DQ080081.1 GI:71726703
NC_007150.1	187052	195221	26. Procyon lotor papillomavirus 1 complete genome 8 170 bp circular DNA NC_007150.1 GI:68304288
AY763115.1	195222	203391	27. Procyon lotor papillomavirus type 1 isolate Z146-02 complete genome 8 170 bp circular DNA AY763115.1 GI:59595742
NC_012485.1	203392	210737	28. Human papillomavirus type 109 complete genome 7 346 bp circular DNA NC_012485.1 GI:225927560
EU503122.1	210738	218539	29. Equine papillomavirus 2 complete genome 7 802 bp circular DNA EU503122.1 GI:187938329
EF467176.1	218540	225865	30. Human papillomavirus type 88 complete genome 7 326 bp circular DNA EF467176.1 GI:149127115
NC_004104.1	225866	233898	31. Human papillomavirus type 90 complete genome 8 033 bp circular DNA NC_004104.1 GI:22138122
FJ006723.1	233899	241861	32. Human papillomavirus type 16 complete genome 7 963 bp circular DNA FJ006723.1 GI:196170262
GQ246951.1	241862	249458	33. Human papillomavirus type 118 clone K2 complete genome 7 597 bp circular DNA GQ246951.1 GI:256807731
EF422221.1	249459	257020	34. Human papillomavirus type 107 complete genome 7 562 bp circular DNA EF422221.1 GI:126131393
NC_001526.2	257021	264925	35. Human papillomavirus type 16 complete genome 7 905 bp circular DNA NC_001526.2 GI:310698439
FJ796965.1	264926	272269	36. Ovine papillomavirus type 3 isolate Sar1 complete genome 7 344 bp circular DNA FJ796965.1 GI:226446757
U06714.1	272270	280070	37. Human papillomavirus type 1a (3-3) complete genome 7 801 bp linear DNA U06714.1 GI:458704
AY395706.1	280071	288162	38. Human papillomavirus type 62 isolate Qv18091 complete genome 8 092 bp circular DNA AY395706.1 GI:39932599
AF436129.1	288163	295879	39. Human papillomavirus type 54 subtype AE9 complete genome 7 717 bp linear DNA AF436129.1 GI:27462475
AF486184.1	295880	303155	40. Bovine papillomavirus type 3 complete genome 7 276 bp circular DNA AF486184.1 GI:22901309
AF457465.1	303156	310996	41. Bovine papillomavirus type 5 complete genome 7 841 bp linear DNA AF457465.1 GI:22901263
AY057438.1	310997	319029	42. Human papillomavirus type 90 complete genome 8 033 bp linear DNA AY057438.1 GI:22121637
AF436128.1	319030	327107	43. Human papillomavirus - cand89 complete genome 8 078 bp linear DNA AF436128.1 GI:22095322
AF419318.1	327108	335073	44. Human papillomavirus type 91 complete genome 7 966 bp circular DNA AF419318.1 GI:22023568
AF349909.1	335074	343056	45. Human papillomavirus type 86 candidate complete genome 7 983 bp linear DNA AF349909.1 GI:15741127
NC_001676.1	343057	350815	46. Human papillomavirus 54 complete genome 7 759 bp linear DNA NC_001676.1 GI:9628437
U83594.1	350816	358576	47. Ovine papillomavirus 1 complete genome 7 761 bp circular DNA U83594.1 GI:1813785
M60184.1	358577	366604	48. Rhesus papillomavirus type 1 complete genome 8 028 bp linear DNA M60184.1 GI:1019918
U37488.1	366605	374363	49. Human papillomavirus type 54 complete genome 7 759 bp linear DNA U37488.1 GI:1017782
HM057182.1	374364	382278	50. Human papillomavirus type 16 isolate Amazonian complete genome 7 915 bp circular DNA HM057182.1 GI:296936109
AB543507.1	382279	389529	51. Bovine papillomavirus - 11 DNA complete genome 7 251 bp circular DNA AB543507.1 GI:301335131
NC_014326.1	389530	397039	52. Mus musculus papillomavirus type 1 complete genome 7 510 bp circular DNA NC_014326.1 GI:301173443
GU808564.1	397040	404549	53. Mus musculus papillomavirus type 1 isolate MusPV complete genome 7 510 bp circular DNA GU808564.1 GI:295924008
NC_006951.1	404550	411977	54. Erethizon dorsatum papillomavirus type 1 complete genome 7 428 bp circular DNA NC_006951.1 GI:62362146
NC_006563.1	411978	419699	55. Trichechus manatus latirostris papillomavirus type 1 complete genome 7 722 bp circular DNA NC_006563.1 GI:56698748
AY684126.1	419700	427127	56. Erethizon dorsatum papillomavirus type 1 complete genome 7 428 bp circular DNA AY684126.1 GI:51860743
AY609301.1	427128	434849	57. Trichechus manatus latirostris papillomavirus type 1 complete genome 7 722 bp circular DNA AY609301.1 GI:51860655
U85660.1	434850	442580	58. Human papillomavirus RTRX7 complete genome 7 731 bp circular DNA U85660.1 GI:2218078
GQ472851.1	442581	450410	59. Human papillomavirus type 68 isolate TJ42-68 complete genome 7 830 bp circular DNA GQ472851.1 GI:260169939
GQ472850.1	450411	458234	60. Human papillomavirus type 58 isolate TJ18-58 complete genome 7 824 bp circular DNA GQ472850.1 GI:260169930
GQ472849.1	458235	466097	61. Human papillomavirus type 53 isolate TJ43-53 complete genome 7 863 bp circular DNA GQ472849.1 GI:260169923
GQ472848.1	466098	474057	62. Human papillomavirus type 52 isolate TJ49-52 complete genome 7 960 bp circular DNA GQ472848.1 GI:260169916
GQ472847.1	474058	481977	63. Human papillomavirus type 42 isolate TJ43-42 complete genome 7 920 bp circular DNA GQ472847.1 GI:260169909
FN907964.1	481978	489910	64. Human papillomavirus type 11 complete genome isolate LP13 7 933 bp circular DNA FN907964.1 GI:298103671
FN907963.1	489911	497853	65. Human papillomavirus type 11 complete genome isolate CS20 7 943 bp circular DNA FN907963.1 GI:298103661
FN907962.1	497854	505787	66. Human papillomavirus type 11 complete genome isolate CAC86 7 934 bp circular DNA FN907962.1 GI:298103651
FN907961.1	505788	513720	67. Human papillomavirus type 11 complete genome isolate A48 7 933 bp circular DNA FN907961.1 GI:298103641
FN907960.1	513721	521653	68. Human papillomavirus type 11 complete genome isolate CAC246 7 933 bp circular DNA FN907960.1 GI:298103631
FN907959.1	521654	529586	69. Human papillomavirus type 11 complete genome isolate A47 7 933 bp circular DNA FN907959.1 GI:298103621
FN907958.1	529587	537518	70. Human papillomavirus type 11 complete genome isolate A260 7 932 bp circular DNA FN907958.1 GI:298103611
FN907957.1	537519	545451	71. Human papillomavirus type 11 complete genome isolate LP12 7 933 bp circular DNA FN907957.1 GI:298103601
FN870022.1	545452	553385	72. Human papillomavirus type 11 complete genome isolate A346 7 934 bp circular DNA FN870022.1 GI:297523826
FN870021.1	553386	561318	73. Human papillomavirus type 11 complete genome isolate A86 7 933 bp circular DNA FN870021.1 GI:297523816
NC_014185.1	561319	568660	74. Human papillomavirus type 121 complete genome 7 342 bp circular DNA NC_014185.1 GI:297342356
GQ845446.1	568661	576149	75. Human papillomavirus type 124 complete genome 7 489 bp circular DNA GQ845446.1 GI:296495868
GQ845445.1	576150	583478	76. Human papillomavirus type 123 complete genome 7 329 bp circular DNA GQ845445.1 GI:296495860
GQ845444.1	583479	590875	77. Human papillomavirus type 122 complete genome 7 397 bp circular DNA GQ845444.1 GI:296495852
GQ845443.1	590876	598217	78. Human papillomavirus type 121 complete genome 7 342 bp circular DNA GQ845443.1 GI:296495844
GQ845442.1	598218	605521	79. Human papillomavirus type 120 complete genome 7 304 bp circular DNA GQ845442.1 GI:296495836
GQ845441.1	605522	612772	80. Human papillomavirus type 119 complete genome 7 251 bp circular DNA GQ845441.1 GI:296495828
NC_014143.1	612773	620509	81. Bettongia penicillata papillomavirus 1 complete genome 7 737 bp circular DNA NC_014143.1 GI:296040251
FN677756.1	620510	627895	82. Human papillomavirus type 151 complete genome isolate SIBX2 7 386 bp circular DNA FN677756.1 GI:290964861
FN677755.1	627896	635331	83. Human papillomavirus type 150 complete genome isolate SIBX1 7 436 bp circular DNA FN677755.1 GI:290964853
GU220391.1	635332	643068	84. Bettongia penicillata papillomavirus complete genome 7 737 bp circular DNA GU220391.1 GI:295639544
AF092932.1	643069	651080	85. Human papillomavirus type 6 complete genome 8 012 bp linear DNA AF092932.1 GI:6002612
AF131950.1	651081	658892	86. Human papillomavirus candHPV85 complete genome 7 812 bp circular DNA AF131950.1 GI:4574720
FJ379293.1	658893	667148	87. European hedgehog papillomavirus complete genome 8 256 bp circular DNA FJ379293.1 GI:218203064
AF536180.1	667149	675054	88. Human papillomavirus type 16 isolate African-1 type complete genome 7 906 bp circular DNA AF536180.1 GI:33330945
AF536179.1	675055	682958	89. Human papillomavirus type 16 isolate European German 131 type complete genome 7 904 bp circular DNA AF536179.1 GI:33330936
AF402678.1	682959	690864	90. Human papillomavirus type 16 Asian-American variant complete genome 7 906 bp circular DNA AF402678.1 GI:29468132
AF472509.1	690865	698768	91. Human papillomavirus type 16 variant (African type 2) complete genome 7 904 bp circular DNA AF472509.1 GI:27463084
AF472508.1	698769	706676	92. Human papillomavirus type 16 variant (African type 1) complete genome 7 908 bp circular DNA AF472508.1 GI:27463075
AF436130.1	706677	714563	93. Human papillomavirus type 74 subtype AE10 complete genome 7 887 bp linear DNA AF436130.1 GI:27462483
AF443292.1	714564	722653	94. Reindeer papillomavirus complete genome 8 090 bp circular DNA AF443292.1 GI:22901245
AF394740.1	722654	730266	95. Equinus papillomavirus complete genome 7 613 bp linear DNA AF394740.1 GI:22901192
AF498323.1	730267	737876	96. Equus caballus papillomavirus type 1 complete genome 7 610 bp linear DNA AF498323.1 GI:20335004
AF293961.1	737877	745780	97. Human papillomavirus type 82 subtype IS39/AE2 complete genome 7 904 bp linear DNA AF293961.1 GI:13507120
AF293960.1	745781	753728	98. Human papillomavirus type 84 complete genome 7 948 bp linear DNA AF293960.1 GI:12958167
AF227240.1	753729	761293	99. Rabbit oral papillomavirus complete genome 7 565 bp linear DNA AF227240.1 GI:7677340
AF151983.1	761294	769397	100. Human papillomavirus type 83 complete genome 8 104 bp linear DNA AF151983.1 GI:5059324
AF125673.1	769398	777301	101. Human papillomavirus type 16 isolate 16W12E complete genome 7 904 bp circular DNA AF125673.1 GI:4927719
AF020905.1	777302	785190	102. Common chimpanzee papillomavirus 1 complete genome 7 889 bp linear DNA AF020905.1 GI:2454637
J04353.1	785191	793102	103. Human papillomavirus type 31 (HPV-31) complete genome 7 912 bp circular DNA J04353.1 GI:333048
M20219.1	793103	801039	104. Bovine papillomavirus type 2 complete genome 7 937 bp linear DNA M20219.1 GI:332996
AF534061.1	801040	808944	105. Human papillomavirus type 16 East Asian type complete genome 7 905 bp linear DNA AF534061.1 GI:33330060
AF420235.1	808945	816248	106. Psittacus erithacus timneh papillomavirus complete genome 7 304 bp circular DNA AF420235.1 GI:21693250
AF480454.1	816249	824548	107. Felis domesticus papillomavirus type 1 complete genome 8 300 bp circular DNA AF480454.1 GI:19224322
GQ180792.1	824549	832405	108. Human papillomavirus type 18 isolate CU16 complete genome 7 857 bp linear DNA GQ180792.1 GI:285804407
GQ180791.1	832406	840262	109. Human papillomavirus type 18 isolate CU15 complete genome 7 857 bp linear DNA GQ180791.1 GI:285804398
GQ180790.1	840263	848119	110. Human papillomavirus type 18 isolate CU14 complete genome 7 857 bp linear DNA GQ180790.1 GI:285804389
GQ180789.1	848120	855976	111. Human papillomavirus type 18 isolate CU13 complete genome 7 857 bp linear DNA GQ180789.1 GI:285804380
GQ180788.1	855977	863833	112. Human papillomavirus type 18 isolate CU12 complete genome 7 857 bp linear DNA GQ180788.1 GI:285804371
GQ180787.1	863834	871677	113. Human papillomavirus type 18 isolate CU11 complete genome 7 844 bp linear DNA GQ180787.1 GI:285804362
GQ180786.1	871678	879534	114. Human papillomavirus type 18 isolate CU10 complete genome 7 857 bp linear DNA GQ180786.1 GI:285804353
GQ180785.1	879535	887391	115. Human papillomavirus type 18 isolate CU9 complete genome 7 857 bp linear DNA GQ180785.1 GI:285804344
GQ180784.1	887392	895248	116. Human papillomavirus type 18 isolate CU8 complete genome 7 857 bp linear DNA GQ180784.1 GI:285804335
NC_012486.1	895249	902475	117. Human papillomavirus type 112 complete genome 7 227 bp circular DNA NC_012486.1 GI:225927568
NC_013237.1	902476	910717	118. Canine papillomavirus 6 complete genome 8 242 bp circular DNA NC_013237.1 GI:258611059
NC_013236.1	910718	918527	119. Canine papillomavirus 5 complete genome 7 810 bp circular DNA NC_013236.1 GI:258611051
NC_013196.1	918528	925905	120. Rattus norvegicus papillomavirus 1 EES-2009 complete genome 7 378 bp circular DNA NC_013196.1 GI:257136426
NC_013117.1	925906	933403	121. Francolinus leucoscepus papillomavirus 1 complete genome 7 498 bp circular DNA NC_013117.1 GI:256352174
NC_012213.1	933404	940552	122. Human papillomavirus type 108 complete genome 7 149 bp circular DNA NC_012213.1 GI:224983322
NC_012123.1	940553	948354	123. Equine papillomavirus 2 complete genome 7 802 bp circular DNA NC_012123.1 GI:224460777
NC_011765.1	948355	956610	124. Erinaceus europaeus papillomavirus complete genome 8 256 bp circular DNA NC_011765.1 GI:218685637
NC_011531.1	956611	963563	125. Chelonia mydas papillomavirus 1 complete genome 6 953 bp circular DNA NC_011531.1 GI:212286056
NC_011530.1	963564	970583	126. Caretta caretta papillomavirus 1 complete genome 7 020 bp circular DNA NC_011530.1 GI:212286048
NC_011280.1	970584	977843	127. Sus scrofa papillomavirus type 1 complete genome 7 260 bp circular DNA NC_011280.1 GI:206599537
NC_011110.1	977844	985758	128. Tursiops truncatus papillomavirus type 3 complete genome 7 915 bp circular DNA NC_011110.1 GI:195661192
NC_011109.1	985759	993847	129. Tursiops truncatus papillomavirus type 1 complete genome 8 089 bp circular DNA NC_011109.1 GI:195661184
NC_010739.1	993848	1001429	130. Ursus maritimus papillomavirus type 1 complete genome 7 582 bp circular DNA NC_010739.1 GI:189043078
NC_010329.1	1001430	1008755	131. Human papillomavirus type 88 complete genome 7 326 bp circular DNA NC_010329.1 GI:167600365
NC_010226.1	1008756	1016497	132. Canine papillomavirus 4 complete genome 7 742 bp circular DNA NC_010226.1 GI:164429763
NC_009752.1	1016498	1024288	133. Bovine papillomavirus 8 complete genome 7 791 bp linear DNA NC_009752.1 GI:156522770
NC_008582.1	1024289	1031681	134. Old World harvest mouse papillomavirus complete genome 7 393 bp circular DNA NC_008582.1 GI:118129780
NC_008519.1	1031682	1039203	135. Mastomys coucha papillomavirus 2 complete genome 7 522 bp circular DNA NC_008519.1 GI:116536728
NC_008298.1	1039204	1047173	136. Rousettus aegyptiacus papillomavirus type 1 complete genome 7 970 bp circular DNA NC_008298.1 GI:113200763
NC_008297.1	1047174	1054974	137. Canine papillomavirus 3 complete genome 7 801 bp circular DNA NC_008297.1 GI:113200740
NC_008189.1	1054975	1062233	138. Human papillomavirus type 101 complete genome 7 259 bp circular DNA NC_008189.1 GI:109390389
NC_008188.1	1062234	1069496	139. Human papillomavirus type 103 complete genome 7 263 bp circular DNA NC_008188.1 GI:109390382
NC_008184.1	1069497	1077362	140. Tursiops truncatus papillomavirus type 2 complete genome 7 866 bp circular DNA NC_008184.1 GI:109390374
NC_008032.1	1077363	1084904	141. Capra hircus papillomavirus type 1 complete genome 7 542 bp circular DNA NC_008032.1 GI:97331426
NC_007612.1	1084905	1092316	142. Canine papillomavirus 7 complete genome 7 412 bp circular DNA NC_007612.1 GI:82547780
NC_006564.1	1092317	1100417	143. Canine papillomavirus 2 complete genome 8 101 bp circular DNA NC_006564.1 GI:56693036
NC_005134.2	1100418	1107855	144. Human papillomavirus type 96 complete genome 7 438 bp circular DNA NC_005134.2 GI:50253426
NC_004500.1	1107856	1115316	145. Human papillomavirus type 92 complete genome 7 461 bp circular DNA NC_004500.1 GI:27531786
NC_004194.1	1115317	1122929	146. Equinus papillomavirus complete genome 7 613 bp circular DNA NC_004194.1 GI:23217032
NC_004195.1	1122930	1130770	147. Bovine papillomavirus type 5 complete genome 7 841 bp circular DNA NC_004195.1 GI:23217014
NC_004068.1	1130771	1138499	148. Fringilla coelebs papillomavirus complete genome 7 729 bp circular DNA NC_004068.1 GI:21844535
NC_003973.1	1138500	1145803	149. Psittacus erithacus timneh papillomavirus complete genome 7 304 bp circular DNA NC_003973.1 GI:21326229
NC_003748.1	1145804	1153413	150. Equus caballus papillomavirus - 1 complete genome 7 610 bp circular DNA NC_003748.1 GI:20428628
NC_003348.1	1153414	1161292	151. Phocoena spinipinnis papillomavirus complete genome 7 879 bp linear DNA NC_003348.1 GI:18138516
NC_002232.1	1161293	1168857	152. Rabbit oral papillomavirus complete genome 7 565 bp linear DNA NC_002232.1 GI:9635132
NC_001838.1	1168858	1176746	153. Common chimpanzee papillomavirus 1 complete genome 7 889 bp linear DNA NC_001838.1 GI:9629720
NC_001789.1	1176747	1184507	154. Ovine papillomavirus - 1 complete genome 7 761 bp circular DNA NC_001789.1 GI:9629249
NC_001693.1	1184508	1191820	155. Human papillomavirus type 60 complete genome 7 313 bp linear DNA NC_001693.1 GI:9628566
NC_001691.1	1191821	1199004	156. Human papillomavirus type 50 complete genome 7 184 bp linear DNA NC_001691.1 GI:9628550
NC_001690.1	1199005	1206104	157. Human papillomavirus type 48 complete genome 7 100 bp linear DNA NC_001690.1 GI:9628542
NC_001619.1	1206105	1214711	158. Canine oral papillomavirus complete genome 8 607 bp circular DNA NC_001619.1 GI:9627734
NC_001605.1	1214712	1222398	159. Mastomys natalensis papillomavirus complete genome 7 687 bp circular DNA NC_001605.1 GI:9627486
NC_001595.1	1222399	1230425	160. Human papillomavirus type 7 complete genome 8 027 bp circular DNA NC_001595.1 GI:9627389
NC_001593.1	1230426	1238281	161. Human papillomavirus type 53 complete genome 7 856 bp circular DNA NC_001593.1 GI:9627377
NC_001587.1	1238282	1246004	162. Human papillomavirus type 34 complete genome 7 723 bp circular DNA NC_001587.1 GI:9627334
NC_001586.1	1246005	1253965	163. Human papillomavirus type 32 complete genome 7 961 bp circular DNA NC_001586.1 GI:9627327
NC_001583.1	1253966	1261820	164. Human papillomavirus type 26 complete genome 7 855 bp circular DNA NC_001583.1 GI:9627305
NC_001576.1	1261821	1269739	165. Human papillomavirus type 10 complete genome 7 919 bp circular DNA NC_001576.1 GI:9627257
NC_001541.1	1269740	1277607	166. Cottontail rabbit papillomavirus complete genome 7 868 bp circular DNA NC_001541.1 GI:9627196
NC_001524.1	1277608	1285702	167. European elk papillomavirus complete genome 8 095 bp circular DNA NC_001524.1 GI:9627074
NC_001523.1	1285703	1294076	168. Deer papillomavirus complete genome 8 374 bp circular DNA NC_001523.1 GI:9627065
NC_001522.1	1294077	1302021	169. Bovine papillomavirus - 1 complete genome 7 945 bp circular DNA NC_001522.1 GI:9627056
NC_001458.1	1302022	1309369	170. Human papillomavirus type 63 complete genome 7 348 bp circular DNA NC_001458.1 GI:9626605
NC_001457.1	1309370	1316722	171. Human papillomavirus type 4 complete genome 7 353 bp circular DNA NC_001457.1 GI:9626597
NC_001357.1	1316723	1324579	172. Human papillomavirus - 18 complete genome 7 857 bp circular DNA NC_001357.1 GI:9626069
NC_001356.1	1324580	1332394	173. Human papillomavirus - 1 complete genome 7 815 bp circular DNA NC_001356.1 GI:9626063
NC_001355.1	1332395	1340296	174. Human papillomavirus type 6b complete genome 7 902 bp circular DNA NC_001355.1 GI:9626053
NC_001354.1	1340297	1347910	175. Human papillomavirus type 41 complete genome 7 614 bp circular DNA NC_001354.1 GI:9626041
NC_001352.1	1347911	1355770	176. Human papillomavirus - 2 complete genome 7 860 bp circular DNA NC_001352.1 GI:9626032
EF436229.1	1355771	1363613	177. Human papillomavirus type 97 isolate 624 complete genome 7 843 bp circular DNA EF436229.1 GI:126738383
FN547152.1	1363614	1371422	178. Human papillomavirus type 125 complete genome strain SIBX9 7 809 bp circular DNA FN547152.1 GI:257735417
FJ610152.1	1371423	1379327	179. Human papillomavirus type 16 strain CU7 complete genome 7 905 bp circular DNA FJ610152.1 GI:242347743
FJ610151.1	1379328	1387233	180. Human papillomavirus type 16 strain CU6 complete genome 7 906 bp circular DNA FJ610151.1 GI:242347734
FJ610150.1	1387234	1395138	181. Human papillomavirus type 16 strain CU5 complete genome 7 905 bp circular DNA FJ610150.1 GI:242347725
FJ610149.1	1395139	1403044	182. Human papillomavirus type 16 strain CU4 complete genome 7 906 bp circular DNA FJ610149.1 GI:242347716
FJ610148.1	1403045	1410950	183. Human papillomavirus type 16 strain CU3 complete genome 7 906 bp circular DNA FJ610148.1 GI:242347707
FJ610147.1	1410951	1418856	184. Human papillomavirus type 16 strain CU2 complete genome 7 906 bp circular DNA FJ610147.1 GI:242347698
FJ610146.1	1418857	1426762	185. Human papillomavirus type 16 strain CU1 complete genome 7 906 bp circular DNA FJ610146.1 GI:242347689
EU918769.1	1426763	1434596	186. Human papillomavirus type 68 isolate LZod68-68 complete genome 7 834 bp circular DNA EU918769.1 GI:218931450
EU918768.1	1434597	1442529	187. Human papillomavirus type 11 isolate LZod45-11 complete genome 7 933 bp circular DNA EU918768.1 GI:218931440
EU918767.1	1442530	1450426	188. Human papillomavirus type 59 isolate LZod68-59 complete genome 7 897 bp circular DNA EU918767.1 GI:218931431
EU918766.1	1450427	1458259	189. Human papillomavirus type 33 isolate LZcc12-33 complete genome 7 833 bp circular DNA EU918766.1 GI:218931422
EU918765.1	1458260	1466083	190. Human papillomavirus type 58 isolate LZcc86-58 complete genome 7 824 bp circular DNA EU918765.1 GI:218931413
EU918764.1	1466084	1473987	191. Human papillomavirus type 16 isolate LZcc11-16 complete genome 7 904 bp circular DNA EU918764.1 GI:218931404
EU240895.1	1473988	1481902	192. Tursiops truncatus papillomavirus type 3 complete genome 7 915 bp circular DNA EU240895.1 GI:165909225
EU240894.1	1481903	1489991	193. Tursiops truncatus papillomavirus type 1 complete genome 8 089 bp circular DNA EU240894.1 GI:165909217
GQ244463.1	1489992	1498060	194. Human papillomavirus type 114 complete genome 8 069 bp circular DNA GQ244463.1 GI:289656451
GQ246950.1	1498061	1505955	195. Human papillomavirus type 117 clone K6 complete genome 7 895 bp circular DNA GQ246950.1 GI:256807724
FJ598133.1	1505956	1513981	196. Rhesus papillomavirus type 1b isolate Mac686 complete genome 8 026 bp circular DNA FJ598133.1 GI:256860447
GQ180114.1	1513982	1521359	197. Rattus norvegicus papillomavirus 1 EES-2009 complete genome 7 378 bp circular DNA GQ180114.1 GI:255762023
FJ492744.1	1521360	1529601	198. Canine papillomavirus 6 isolate Zurich complete genome 8 242 bp circular DNA FJ492744.1 GI:255683772
FJ492743.1	1529602	1537411	199. Canine papillomavirus 5 isolate Birkenfeld complete genome 7 810 bp circular DNA FJ492743.1 GI:255683764
FJ492742.1	1537412	1545366	200. Canine papillomavirus 7 isolate Edinburgh complete genome 7 955 bp circular DNA FJ492742.1 GI:255683756
GQ227670.1	1545367	1553380	201. Macaca fascicularis papillomavirus type 11 isolate Mac1637 complete genome 8 014 bp circular DNA GQ227670.1 GI:253558906
EF558839.2	1553381	1561315	202. Macaca fascicularis papillomavirus type 3 Mac26 complete genome 7 935 bp circular DNA EF558839.2 GI:238800244
EU490515.1	1561316	1569235	203. Macaca fascicularis papillomavirus type 10 isolate Mac616 complete genome 7 920 bp circular DNA EU490515.1 GI:218953354
EF591300.1	1569236	1577260	204. Rhesus papillomavirus type 1b isolate Mac170 complete genome 8 025 bp circular DNA EF591300.1 GI:218953352
EU490516.1	1577261	1585248	205. Macaca fascicularis papillomavirus type 9 isolate Mac592 complete genome 7 988 bp circular DNA EU490516.1 GI:186972294
EU188799.1	1585249	1592746	206. Francolinus leucoscepus papillomavirus 1 complete genome 7 498 bp circular DNA EU188799.1 GI:161334757
EF558843.1	1592747	1600736	207. Macaca fascicularis papillomavirus type 5 Mac76 complete genome 7 990 bp circular DNA EF558843.1 GI:161019534
EF558842.1	1600737	1608737	208. Macaca fascicularis papillomavirus type 8 Mac70 complete genome 8 001 bp circular DNA EF558842.1 GI:161019524
EF558841.1	1608738	1616687	209. Macaca fascicularis papillomavirus type 4 Mac54 complete genome 7 950 bp circular DNA EF558841.1 GI:161019514
EF558840.1	1616688	1624630	210. Macaca fascicularis papillomavirus type 6 Mac39 complete genome 7 943 bp circular DNA EF558840.1 GI:161019504
EF558838.1	1624631	1632693	211. Macaca fascicularis papillomavirus type 7 Mac18 complete genome 8 063 bp circular DNA EF558838.1 GI:161019484
EF591299.1	1632694	1640650	212. Macaca fascicularis papillomavirus type 3b isolate Mac171 complete genome 7 957 bp circular DNA EF591299.1 GI:156633497
EF584537.1	1640651	1648392	213. Canine papillomavirus - 4 isolate pug2006 complete genome 7 742 bp circular DNA EF584537.1 GI:156601575
DQ098913.1	1648393	1656183	214. Bovine papillomavirus type 8 complete genome 7 791 bp linear DNA DQ098913.1 GI:89034256
DQ217793.1	1656184	1663595	215. Bovine papillomavirus - 7 complete genome 7 412 bp circular DNA DQ217793.1 GI:78057396
FJ947080.1	1663596	1671071	216. Human papillomavirus type 115 isolate GC02 complete genome 7 476 bp circular DNA FJ947080.1 GI:270048212
FN598907.1	1671072	1678375	217. Human papillomavirus SIBX-3a complete genome isolate SIBX-3a 7 304 bp circular DNA FN598907.1 GI:270119448
DQ080083.1	1678376	1686453	218. Human papillomavirus type 102 complete genome 8 078 bp circular DNA DQ080083.1 GI:71726718
DQ080082.1	1686454	1694488	219. Human papillomavirus type 106 complete genome 8 035 bp circular DNA DQ080082.1 GI:71726710
DQ080080.1	1694489	1702331	220. Human papillomavirus type 97 complete genome 7 843 bp circular DNA DQ080080.1 GI:71726694
DQ080079.1	1702332	1710153	221. Human papillomavirus type 68a complete genome 7 822 bp circular DNA DQ080079.1 GI:71726685
AY686584.1	1710154	1718059	222. Human papillomavirus type 16 isolate Qv17722E complete genome 7 906 bp circular DNA AY686584.1 GI:56463023
AY686583.1	1718060	1725966	223. Human papillomavirus type 16 isolate Qv18158E complete genome 7 907 bp circular DNA AY686583.1 GI:56463014
AY686582.1	1725967	1733873	224. Human papillomavirus type 16 isolate Qv15351AA complete genome 7 907 bp circular DNA AY686582.1 GI:56463005
AY686581.1	1733874	1741779	225. Human papillomavirus type 16 isolate Qv15521E complete genome 7 906 bp circular DNA AY686581.1 GI:56462996
AY686580.1	1741780	1749685	226. Human papillomavirus type 16 isolate Qv16936E complete genome 7 906 bp circular DNA AY686580.1 GI:56462987
AY686579.1	1749686	1757591	227. Human papillomavirus type 16 isolate Qv15321AA complete genome 7 906 bp circular DNA AY686579.1 GI:56462978
AY330623.1	1757592	1765629	228. Human papillomavirus type 71 isolate Qv23143 complete genome 8 038 bp circular DNA AY330623.1 GI:37622201
AY330622.1	1765630	1773660	229. Human papillomavirus type 71 isolate Qv22945 complete genome 8 031 bp circular DNA AY330622.1 GI:37622193
AY330621.1	1773661	1781686	230. Human papillomavirus type 71 isolate Qv22792 complete genome 8 026 bp circular DNA AY330621.1 GI:37622185
AY330620.1	1781687	1789723	231. Human papillomavirus type 71 isolate Qv21030 complete genome 8 037 bp circular DNA AY330620.1 GI:37622177
NC_004765.1	1789724	1798023	232. Felis domesticus papillomavirus type 1 complete genome 8 300 bp circular DNA NC_004765.1 GI:30315794
AF531420.1	1798024	1805484	233. Human papillomavirus type 92 complete genome 7 461 bp linear DNA AF531420.1 GI:27451616
AF502599.1	1805485	1812788	234. Psittacus erithacus timneh papillomavirus complete genome 7 304 bp circular DNA AF502599.1 GI:21311786
U37537.1	1812789	1820656	235. Human papillomavirus type 57b complete genome 7 868 bp linear DNA U37537.1 GI:1845202
U83595.1	1820657	1828414	236. ovine papillomavirus 2 complete genome 7 758 bp circular DNA U83595.1 GI:1813787
U21941.1	1828415	1836319	237. Human papillomavirus type 70 complete genome 7 905 bp linear DNA U21941.1 GI:1173493
U31794.1	1836320	1844143	238. Human papillomavirus type 66 complete genome 7 824 bp linear DNA U31794.1 GI:1020290
U31793.1	1844144	1852132	239. Human papillomavirus type 61 complete genome 7 989 bp linear DNA U31793.1 GI:1020282
U31792.1	1852133	1859445	240. Human papillomavirus type 60 complete genome 7 313 bp linear DNA U31792.1 GI:1020274
U31791.1	1859446	1867267	241. Human papillomavirus type 55 complete genome 7 822 bp linear DNA U31791.1 GI:1020266
U31790.1	1867268	1874451	242. Human papillomavirus type 50 complete genome 7 184 bp linear DNA U31790.1 GI:1020258
U31789.1	1874452	1881551	243. Human papillomavirus type 48 complete genome 7 100 bp linear DNA U31789.1 GI:1020250
U31788.1	1881552	1889384	244. Human papillomavirus type 44 complete genome 7 833 bp linear DNA U31788.1 GI:1020242
U31787.1	1889385	1896784	245. Human papillomavirus type 38 complete genome 7 400 bp linear DNA U31787.1 GI:1020234
U31786.1	1896785	1904205	246. Human papillomavirus type 37 complete genome 7 421 bp linear DNA U31786.1 GI:1020226
U31785.1	1904206	1911927	247. Human papillomavirus type 36 complete genome 7 722 bp linear DNA U31785.1 GI:1020218
U31784.1	1911928	1919843	248. Human papillomavirus type 29 complete genome 7 916 bp linear DNA U31784.1 GI:1020210
U31783.1	1919844	1927802	249. Human papillomavirus type 28 complete genome 7 959 bp linear DNA U31783.1 GI:1020202
U31782.1	1927803	1935254	250. Human papillomavirus type 24 complete genome 7 452 bp linear DNA U31782.1 GI:1020194
U31781.1	1935255	1942578	251. Human papillomavirus type 23 complete genome 7 324 bp linear DNA U31781.1 GI:1020186
U31780.1	1942579	1949946	252. Human papillomavirus type 22 complete genome 7 368 bp linear DNA U31780.1 GI:1020178
U31779.1	1949947	1957725	253. Human papillomavirus type 21 complete genome 7 779 bp linear DNA U31779.1 GI:1020170
U31778.1	1957726	1965482	254. Human papillomavirus type 20 complete genome 7 757 bp linear DNA U31778.1 GI:1020162
L22695.1	1965483	1974089	255. Canine oral papillomavirus complete genome 8 607 bp linear DNA L22695.1 GI:496202
U01834.1	1974090	1981776	256. Multimammate rat papillomavirus complete genome 7 687 bp circular DNA U01834.1 GI:436472
M74117.1	1981777	1989627	257. Human papillomavirus type 35 complete genome 7 851 bp circular DNA M74117.1 GI:333050
M12732.1	1989628	1997536	258. Human papillomavirus type 33 complete genome 7 909 bp circular DNA M12732.1 GI:333049
K02718.1	1997537	2005440	259. Human papillomavirus type 16 (HPV16) complete genome 7 904 bp circular DNA K02718.1 GI:333031
M14119.1	2005441	2013371	260. Human papillomavirus type 11 (HPV-11) complete genome 7 931 bp circular DNA M14119.1 GI:333026
M11910.1	2013372	2021745	261. Deer papillomavirus (DPV) complete genome 8 374 bp circular DNA M11910.1 GI:333021
DQ295066.1	2021746	2029546	262. Canine papillomavirus type 3 complete genome 7 801 bp circular DNA DQ295066.1 GI:83314072
FM955837.2	2029547	2037012	263. Human papillomavirus type 98 complete genome 7 466 bp circular DNA FM955837.2 GI:262113834
FM955842.1	2037013	2044424	264. Human papillomavirus type 113 complete genome 7 412 bp circular DNA FM955842.1 GI:238623465
FM955841.1	2044425	2052091	265. Human papillomavirus type 105 complete genome 7 667 bp circular DNA FM955841.1 GI:238623458
FM955840.1	2052092	2059477	266. Human papillomavirus type 104 complete genome 7 386 bp circular DNA FM955840.1 GI:238623450
FM955839.1	2059478	2066857	267. Human papillomavirus type 100 complete genome 7 380 bp circular DNA FM955839.1 GI:238623442
FM955838.1	2066858	2074555	268. Human papillomavirus type 99 complete genome 7 698 bp circular DNA FM955838.1 GI:238623435
DQ091200.1	2074556	2082097	269. Capra hircus papillomavirus type 1 complete genome 7 542 bp circular DNA DQ091200.1 GI:71727324
EU796884.1	2082098	2089996	270. Feline papillomavirus type 2 isolate Main Coon 2007 complete genome 7 899 bp circular DNA EU796884.1 GI:209402849
EU493091.1	2089997	2096949	271. Chelonia mydas papillomavirus 1 complete genome 6 953 bp circular DNA EU493091.1 GI:187941626
EU493092.1	2096950	2103969	272. Caretta caretta papillomavirus 1 complete genome 7 020 bp circular DNA EU493092.1 GI:187941634
FJ385268.1	2103970	2111793	273. Human papillomavirus type 58 isolate HPV58sc78 complete genome 7 824 bp circular DNA FJ385268.1 GI:211940024
FJ385267.1	2111794	2119629	274. Human papillomavirus type 58 isolate HPV58sc185 complete genome 7 836 bp circular DNA FJ385267.1 GI:211940015
FJ385266.1	2119630	2127454	275. Human papillomavirus type 58 isolate HPV58sc174 complete genome 7 825 bp circular DNA FJ385266.1 GI:211940006
FJ385265.1	2127455	2135278	276. Human papillomavirus type 58 isolate HPV58sc165 complete genome 7 824 bp circular DNA FJ385265.1 GI:211939997
FJ385264.1	2135279	2143102	277. Human papillomavirus type 58 isolate HPV58sc144 complete genome 7 824 bp circular DNA FJ385264.1 GI:211939988
FJ385263.1	2143103	2150926	278. Human papillomavirus type 58 isolate HPV58sc147 complete genome 7 824 bp circular DNA FJ385263.1 GI:211939979
FJ385262.1	2150927	2158750	279. Human papillomavirus type 58 isolate HPV58sc101 complete genome 7 824 bp circular DNA FJ385262.1 GI:211939970
FJ385261.1	2158751	2166574	280. Human papillomavirus type 58 isolate HPV58sc100 complete genome 7 824 bp circular DNA FJ385261.1 GI:211939961
L41216.1	2166575	2174584	281. Human papillomavirus type 6a complete genome 8 010 bp circular DNA L41216.1 GI:940299
FM212639.1	2174585	2181733	282. Human papillomavirus type 108 complete genome 7 149 bp circular DNA FM212639.1 GI:224762743
EF028290.1	2181734	2189321	283. Macaca fascicularis papillomavirus type 1 complete genome 7 588 bp circular DNA EF028290.1 GI:122891970
EF202168.1	2189322	2197164	284. Human papillomavirus type 97 isolate W15189 complete genome 7 843 bp circular DNA EF202168.1 GI:145968379
EF202167.1	2197165	2205013	285. Human papillomavirus type 45 isolate Qv31748 complete genome 7 849 bp circular DNA EF202167.1 GI:145968370
EF202166.1	2205014	2212862	286. Human papillomavirus type 45 isolate Qv31035 complete genome 7 849 bp circular DNA EF202166.1 GI:145968361
EF202165.1	2212863	2220711	287. Human papillomavirus type 45 isolate Qv26351 complete genome 7 849 bp circular DNA EF202165.1 GI:145968352
EF202164.1	2220712	2228560	288. Human papillomavirus type 45 isolate Qv25000 complete genome 7 849 bp circular DNA EF202164.1 GI:145968343
EF202163.1	2228561	2236401	289. Human papillomavirus type 45 isolate Qv06560 complete genome 7 841 bp circular DNA EF202163.1 GI:145968334
EF202162.1	2236402	2244250	290. Human papillomavirus type 45 isolate Qv35960 complete genome 7 849 bp circular DNA EF202162.1 GI:145968325
EF202161.1	2244251	2252099	291. Human papillomavirus type 45 isolate Qv00550 complete genome 7 849 bp circular DNA EF202161.1 GI:145968316
EF202160.1	2252100	2259947	292. Human papillomavirus type 45 isolate Qv30004 complete genome 7 848 bp circular DNA EF202160.1 GI:145968307
EF202159.1	2259948	2267795	293. Human papillomavirus type 45 isolate Qv34178 complete genome 7 848 bp circular DNA EF202159.1 GI:145968298
EF202158.1	2267796	2275643	294. Human papillomavirus type 45 isolate Qv33330 complete genome 7 848 bp circular DNA EF202158.1 GI:145968289
EF202157.1	2275644	2283491	295. Human papillomavirus type 45 isolate Qv27565 complete genome 7 848 bp circular DNA EF202157.1 GI:145968280
EF202156.1	2283492	2291349	296. Human papillomavirus type 45 isolate Qv20214 complete genome 7 858 bp circular DNA EF202156.1 GI:145968271
EF202155.1	2291350	2299173	297. Human papillomavirus type 18 isolate Qv04924 complete genome 7 824 bp circular DNA EF202155.1 GI:145968262
EF202154.1	2299174	2306997	298. Human papillomavirus type 18 isolate Qv03814 complete genome 7 824 bp circular DNA EF202154.1 GI:145968253
EF202153.1	2306998	2314821	299. Human papillomavirus type 18 isolate Qv21444 complete genome 7 824 bp circular DNA EF202153.1 GI:145968244
EF202152.1	2314822	2322665	300. Human papillomavirus type 18 isolate Qv17199 complete genome 7 844 bp circular DNA EF202152.1 GI:145968235
EF202151.1	2322666	2330522	301. Human papillomavirus type 18 isolate Qv02876 complete genome 7 857 bp circular DNA EF202151.1 GI:145968226
EF202150.1	2330523	2338379	302. Human papillomavirus type 18 isolate Qv17955 complete genome 7 857 bp circular DNA EF202150.1 GI:145968217
EF202149.1	2338380	2346236	303. Human papillomavirus type 18 isolate Qv15957 complete genome 7 857 bp circular DNA EF202149.1 GI:145968208
EF202148.1	2346237	2354093	304. Human papillomavirus type 18 isolate Qv21751 complete genome 7 857 bp circular DNA EF202148.1 GI:145968199
EF202147.1	2354094	2361950	305. Human papillomavirus type 18 isolate Qv15586 complete genome 7 857 bp circular DNA EF202147.1 GI:145968190
EF202146.1	2361951	2369807	306. Human papillomavirus type 18 isolate Qv16306 complete genome 7 857 bp circular DNA EF202146.1 GI:145968181
EF202145.1	2369808	2377664	307. Human papillomavirus type 18 isolate Qv17052 complete genome 7 857 bp circular DNA EF202145.1 GI:145968172
EF202144.1	2377665	2385521	308. Human papillomavirus type 18 isolate Qv16302 complete genome 7 857 bp circular DNA EF202144.1 GI:145968163
EF202143.1	2385522	2393378	309. Human papillomavirus type 18 isolate Qv03132 complete genome 7 857 bp circular DNA EF202143.1 GI:145968154
X02346.1	2393379	2401323	310. Bovine papillomavirus - 1 complete genome 7 945 bp linear DNA X02346.1 GI:60965
M15953.1	2401324	2409418	311. European elk papillomavirus complete genome 8 095 bp circular DNA M15953.1 GI:333025
EU410349.1	2409419	2416802	312. Human papillomavirus type 111 complete genome 7 384 bp circular DNA EU410349.1 GI:186461202
EU410348.1	2416803	2424225	313. Human papillomavirus type 110 complete genome 7 423 bp circular DNA EU410348.1 GI:186461194
EU410347.1	2424226	2431626	314. Human papillomavirus FA75/KI88-03 complete genome 7 401 bp circular DNA EU410347.1 GI:186461186
EF395819.1	2431627	2438878	315. Sus scrofa papillomavirus type 1 isolate variant b complete genome 7 252 bp circular DNA EF395819.1 GI:151549163
EF395818.1	2438879	2446138	316. Sus scrofa papillomavirus type 1 isolate variant a complete genome 7 260 bp circular DNA EF395818.1 GI:151549157
AB361563.1	2446139	2453986	317. Human papillomavirus type 57c DNA complete genome 7 848 bp circular DNA AB361563.1 GI:157678963
EF546482.1	2453987	2461849	318. Human papillomavirus type 53 isolate Qv31688 complete genome 7 863 bp circular DNA EF546482.1 GI:156151717
EF546481.1	2461850	2469712	319. Human papillomavirus type 53 isolate Qv18622 complete genome 7 863 bp circular DNA EF546481.1 GI:156151709
EF546480.1	2469713	2477575	320. Human papillomavirus type 53 isolate Qv32783 complete genome 7 863 bp circular DNA EF546480.1 GI:156151701
EF546479.1	2477576	2485438	321. Human papillomavirus type 53 isolate Qv22707 complete genome 7 863 bp circular DNA EF546479.1 GI:156151693
EF546478.1	2485439	2493301	322. Human papillomavirus type 53 isolate Qv24231 complete genome 7 863 bp circular DNA EF546478.1 GI:156151685
EF546477.1	2493302	2501164	323. Human papillomavirus type 53 isolate Qv28044 complete genome 7 863 bp circular DNA EF546477.1 GI:156151677
EF546476.1	2501165	2509027	324. Human papillomavirus type 53 isolate Qv17356 complete genome 7 863 bp circular DNA EF546476.1 GI:156151669
EF546475.1	2509028	2516886	325. Human papillomavirus type 53 isolate Qv33767 complete genome 7 859 bp circular DNA EF546475.1 GI:156151661
EF546474.1	2516887	2524745	326. Human papillomavirus type 53 isolate Qv23055 complete genome 7 859 bp circular DNA EF546474.1 GI:156151653
EF546473.1	2524746	2532604	327. Human papillomavirus type 53 isolate Qv20899 complete genome 7 859 bp circular DNA EF546473.1 GI:156151645
EF546472.1	2532605	2540463	328. Human papillomavirus type 53 isolate Qv04467 complete genome 7 859 bp circular DNA EF546472.1 GI:156151637
EF546471.1	2540464	2548322	329. Human papillomavirus type 53 isolate Qv30969 complete genome 7 859 bp circular DNA EF546471.1 GI:156151629
EF546470.1	2548323	2556181	330. Human papillomavirus type 53 isolate Qv08183 complete genome 7 859 bp circular DNA EF546470.1 GI:156151621
EF546469.1	2556182	2564040	331. Human papillomavirus type 53 isolate Qv32293 complete genome 7 859 bp circular DNA EF546469.1 GI:156151613
EF536349.1	2564041	2571622	332. Ursus maritimus papillomavirus type 1 complete genome 7 582 bp circular DNA EF536349.1 GI:157805407
EU360723.1	2571623	2578893	333. Bovine papillomavirus BAA5-Japan complete genome 7 271 bp circular DNA EU360723.1 GI:169641576
EF177191.1	2578894	2586709	334. Human papillomavirus type 66 clone Qv218 complete genome 7 816 bp circular DNA EF177191.1 GI:138375030
EF177190.1	2586710	2594525	335. Human papillomavirus type 66 clone Qv11088 complete genome 7 816 bp circular DNA EF177190.1 GI:138375013
EF177189.1	2594526	2602341	336. Human papillomavirus type 66 clone Qv24220 complete genome 7 816 bp circular DNA EF177189.1 GI:138374994
EF177188.1	2602342	2610157	337. Human papillomavirus type 66 clone Qv25111 complete genome 7 816 bp circular DNA EF177188.1 GI:138374972
EF177187.1	2610158	2617973	338. Human papillomavirus type 66 clone Qv25260 complete genome 7 816 bp circular DNA EF177187.1 GI:138374954
EF177186.1	2617974	2625797	339. Human papillomavirus type 66 clone Qv25662 complete genome 7 824 bp circular DNA EF177186.1 GI:138374933
EF177185.1	2625798	2633621	340. Human papillomavirus type 66 clone Qv25696 complete genome 7 824 bp circular DNA EF177185.1 GI:138374911
EF177184.1	2633622	2641437	341. Human papillomavirus type 66 clone Qv26488 complete genome 7 816 bp circular DNA EF177184.1 GI:138374884
EF177182.1	2641438	2649253	342. Human papillomavirus type 66 clone Qv35854 complete genome 7 816 bp circular DNA EF177182.1 GI:138374869
EF177183.1	2649254	2657071	343. Human papillomavirus type 66 clone Qv26740 complete genome 7 818 bp circular DNA EF177183.1 GI:138374843
EF177181.1	2657072	2664916	344. Human papillomavirus type 56 clone Qv25665 complete genome 7 845 bp circular DNA EF177181.1 GI:138374823
EF177180.1	2664917	2672761	345. Human papillomavirus type 56 clone Qv24970 complete genome 7 845 bp circular DNA EF177180.1 GI:138374801
EF177179.1	2672762	2680551	346. Human papillomavirus type 56 clone Qv22608 complete genome 7 790 bp circular DNA EF177179.1 GI:138374778
EF177178.1	2680552	2688341	347. Human papillomavirus type 56 clone Qv26458 complete genome 7 790 bp circular DNA EF177178.1 GI:138374760
EF177177.1	2688342	2696207	348. Human papillomavirus type 56 clone Qv26342 complete genome 7 866 bp circular DNA EF177177.1 GI:138374746
EF177176.1	2696208	2704073	349. Human papillomavirus type 56 clone Qv26762 complete genome 7 866 bp circular DNA EF177176.1 GI:138374731
D90252.1	2704074	2711852	350. Human papillomavirus type 5b complete genome 7 779 bp circular DNA D90252.1 GI:222395
D90400.1	2711853	2719676	351. Human papillomavirus type 58 complete genome 7 824 bp circular DNA D90400.1 GI:222386
EF117891.1	2719677	2727535	352. Human papillomavirus type 2 isolate CN-HB1 complete genome 7 859 bp circular DNA EF117891.1 GI:126507136
EF117890.1	2727536	2735398	353. Human papillomavirus type 2 isolate CN-SC1 complete genome 7 863 bp circular DNA EF117890.1 GI:126507128
EU118173.1	2735399	2743304	354. Human papillomavirus type 16 clone 114/K complete genome 7 906 bp circular DNA EU118173.1 GI:157087542
DQ098917.1	2743305	2751077	355. Bovine papillomavirus type 8-EB complete genome 7 773 bp linear DNA DQ098917.1 GI:89034263
DQ180494.1	2751078	2759155	356. Uncia uncia papillomavirus type 1 complete genome 8 078 bp circular DNA DQ180494.1 GI:77157775
AY904724.1	2759156	2767258	357. Panthera leo persica papillomavirus type 1 complete genome 8 103 bp circular DNA AY904724.1 GI:62547913
AY904723.1	2767259	2775579	358. Puma concolor papillomavirus type 1 complete genome 8 321 bp circular DNA AY904723.1 GI:62547905
AY904722.1	2775580	2783812	359. Lynx rufus papillomavirus type 1 complete genome 8 233 bp circular DNA AY904722.1 GI:62547897
AJ238373.1	2783813	2791691	360. Phocoena spinipinnis papillomavirus complete genome 7 879 bp linear DNA AJ238373.1 GI:18076063
EF362755.1	2791692	2799554	361. Human papillomavirus type 2 isolate C1 complete genome 7 863 bp circular DNA EF362755.1 GI:125660686
EF362754.1	2799555	2807413	362. Human papillomavirus type 2 isolate C2 complete genome 7 859 bp circular DNA EF362754.1 GI:125660678
DQ269468.1	2807414	2814806	363. Old World harvest mouse papillomavirus complete genome 7 393 bp circular DNA DQ269468.1 GI:82621093
AY382779.2	2814807	2822244	364. Human papillomavirus type 96 complete genome 7 438 bp circular DNA AY382779.2 GI:50236486
AY382778.1	2822245	2829694	365. Human papillomavirus type 93 complete genome 7 450 bp circular DNA AY382778.1 GI:37089393
DQ080078.1	2829695	2836957	366. Human papillomavirus type 103 complete genome 7 263 bp circular DNA DQ080078.1 GI:71726678
AY722648.1	2836958	2845058	367. Canine papillomavirus 2 complete genome 8 101 bp circular DNA AY722648.1 GI:51989424
AJ243287.1	2845059	2852925	368. Cottontail rabbit papillomavirus subtype b complete genome 7 867 bp circular DNA AJ243287.1 GI:8919565
AY956402.1	2852926	2860791	369. Tursiops truncatus papillomavirus type 2 complete genome 7 866 bp linear DNA AY956402.1 GI:77168408
DQ664501.1	2860792	2868313	370. Mastomys coucha papillomavirus 2 complete genome 7 522 bp circular DNA DQ664501.1 GI:110225453
DQ090005.2	2868314	2875713	371. Human papillomavirus type 38b subtype FA125 complete genome 7 400 bp linear DNA DQ090005.2 GI:74484000
DQ366842.1	2875714	2883683	372. Rousettus aegyptiacus papillomavirus type 1 complete genome 7 970 bp circular DNA DQ366842.1 GI:86371928
D55633.1	2883684	2892290	373. Canine oral papillomavirus complete genome sequence 8 607 bp linear DNA D55633.1 GI:862333
DQ344807.1	2892291	2900170	374. Human papillomavirus type 13 complete genome 7 880 bp circular DNA DQ344807.1 GI:85827580
AB201226.1	2900171	2907946	375. Human papillomavirus type 94 DNA nearly complete genome Korean variant 7 776 bp linear DNA AB201226.1 GI:58430757
AB211993.1	2907947	2915777	376. Human papillomavirus type 27b DNA complete genome 7 831 bp circular DNA AB211993.1 GI:71061109
X70829.1	2915778	2923085	377. Human papillomavirus type 65 complete genome 7 308 bp linear DNA X70829.1 GI:312100
X70828.1	2923086	2930433	378. Human papillomavirus type 63 complete genome 7 348 bp linear DNA X70828.1 GI:312092
X70827.1	2930434	2937786	379. Human papillomavirus type 4 complete genome 7 353 bp linear DNA X70827.1 GI:312084
AJ620211.1	2937787	2945667	380. Human papillomavirus type 94 complete genome 7 881 bp circular DNA AJ620211.1 GI:40804528
AJ620209.1	2945668	2953737	381. Human papillomavirus type 81 complete genome 8 070 bp circular DNA AJ620209.1 GI:40804509
AJ620208.1	2953738	2961033	382. Bovine papillomavirus type 6 complete genome 7 296 bp circular DNA AJ620208.1 GI:40804501
AJ620207.1	2961034	2968308	383. Bovine papillomavirus type 3 complete genome 7 275 bp linear DNA AJ620207.1 GI:40804492
AJ620206.1	2968309	2976148	384. Bovine papillomavirus type 5 complete genome 7 840 bp circular DNA AJ620206.1 GI:40804485
AJ620205.1	2976149	2984123	385. Human papillomavirus type 43 complete genome 7 975 bp circular DNA AJ620205.1 GI:40804474
AJ400628.2	2984124	2992121	386. Human papillomavirus type 87 (candidate) complete genome 7 998 bp circular DNA AJ400628.2 GI:14475578
AJ404003.1	2992122	2999989	387. Papillomavirus sylvilagi a4 complete genome 7 868 bp circular DNA AJ404003.1 GI:8919744
AB027020.1	2999990	3007689	388. Human papillomavirus type 69 DNA complete genome 7 700 bp circular DNA AB027020.1 GI:6970418
AB040456.1	3007690	3015706	389. Human papillomavirus type 71 DNA complete genome 8 017 bp circular DNA AB040456.1 GI:12060351
AB027021.1	3015707	3023577	390. Human papillomavirus type 82 DNA complete genome 7 871 bp circular DNA AB027021.1 GI:6970427
D21208.1	3023578	3031378	391. Human papillomavirus type 67 complete genome 7 801 bp circular DNA D21208.1 GI:3228267
M12737.1	3031379	3039032	392. Human papillomavirus type 8 complete genome 7 654 bp circular DNA M12737.1 GI:333074
K02708.1	3039033	3046900	393. Cottontail rabbit (Shope) papillomavirus complete genome 7 868 bp circular DNA K02708.1 GI:333537
